# Supplementary material for: High Levels of Policosanols and Phytosterols from Sugar Mill Waste by Subcritical Liquefied Dimethyl Ether
Source: MDPI journal article supplement (doi:10.3390/foods11192937), 2022-09-20
Supplement: s1 [file s1]

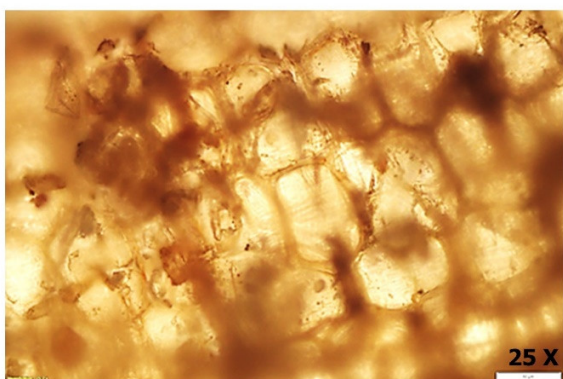

(a)

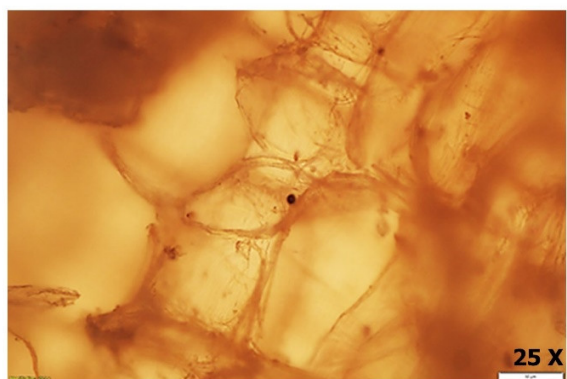

(b)

**Figure S1.** Fluorescence microscope images of sugarcane leaves before (a) and after (b) extraction by subcritical liquefied dimethyl ether (SUBLDME)
